# Hemodynamic and Neuropathological Analysis in Rats with Aluminum Trichloride-Induced Alzheimer's Disease

Szu-Ming Chen<sup>1,2</sup>, Chi-Chen Fan<sup>2,5</sup>, Ming-Shiuan Chiue<sup>3,4</sup>, Chi Chou<sup>5</sup>, Jyh-Horng Chen<sup>3\*</sup>, Ruey-Shyang Hseu<sup>1\*</sup>

**1** Department of Biochemical Science and Technology, College of Life Science, National Taiwan University, Taipei, Taiwan, **2** Department of Medical Laboratory Science and Biotechnology, Yuanpei University, Hsinchu, Taiwan, **3** Interdisciplinary MRI/MRS Lab, Department of Electrical Engineering and Molecular Imaging Center, National Taiwan University, Taipei, Taiwan, **4** Graduate Institute of Biomedical Engineering, National Taiwan University, Taipei, Taiwan, **5** Department of Physiology, Mackay Memorial Hospital, Taipei, Taiwan

## Abstract

**Background and Aims:** Hemodynamic normality is crucial to maintaining the integrity of cerebral vessels and, therefore, preserving the cognitive functions of Alzheimer's disease patients. This study investigates the implications of the hemodynamic changes and the neuropathological diversifications of AlCl<sub>3</sub>-induced AD.

**Methods:** The experimental animals were 8- to 12-wk-old male Wistar rats. The rats were randomly divided into 2 groups: a control group and a (+)control group. Food intake, water intake, and weight changes were recorded daily for 22 wk. Synchronously, the regional cerebral blood flow (rCBF) of the rats with AlCl<sub>3</sub>-induced AD were measured using magnetic resonance imaging (MRI). The hemorheological parameters were analyzed using a computerized auto-rotational rheometer. The brain tissue of the subjects was analyzed using immunohistological chemical (IHC) staining to determine the beta-amyloid (A $\beta$ ) levels.

**Results:** The results of hemodynamic analysis revealed that the whole blood viscosity (WBV), fibrinogen, plasma viscosity and RBC aggregation index (RAI) in (+)control were significantly higher than that of control group, while erythrocyte electrophoresis (EI) of whole blood in (+)control were significantly lower than that of control group. The results of acetylcholinesterase-RBC (AChE-RBC) in the (+)control group was significantly higher than that of the control group. The results also show that the reduction of rCBF in rats with AlCl<sub>3</sub>-induced AD was approximately 50% to 60% that of normal rats. IHC stain results show that significantly more A $\beta$  plaques accumulated in the hippocampus and cortex of the (+)control than in the control group.

**Conclusion:** The results accentuate the importance of hemorheology and reinforce the specific association between hemodynamic and neuropathological changes in rats with AlCl<sub>3</sub>-induced AD. Hemorheological parameters, such as WBV and fibrinogen, and AChE-RBC were ultimately proven to be useful biomarkers of the severity and progression of AD patients. In addition, the parameters can be substituted for invasive inspection in therapeutic intervention.

**Citation:** Chen S-M, Fan C-C, Chiue M-S, Chou C, Chen J-H, et al. (2013) Hemodynamic and Neuropathological Analysis in Rats with Aluminum Trichloride-Induced Alzheimer's Disease. PLoS ONE 8(12): e82561. doi:10.1371/journal.pone.0082561

**Editor:** Stefano L. Sensi, University G. D'Annunzio, Italy

**Received:** July 24, 2013; **Accepted:** October 25, 2013; **Published:** December 20, 2013

**Copyright:** © 2013 Chen et al. This is an open-access article distributed under the terms of the Creative Commons Attribution License, which permits unrestricted use, distribution, and reproduction in any medium, provided the original author and source are credited.

**Funding:** This work was supported by Taiwan Sigma Biotech Corp. and Central Lab. The funders had no role in study design, data collection and analysis, decision to publish, or preparation of the manuscript.

**Competing Interests:** This study was funded by Taiwan Sigma Biotech Corp. There are no patents, products in development or marketed products to declare. This does not alter the authors' adherence to all the PLOS ONE policies on sharing data and materials, as detailed online in the guide for authors.

\* E-mail: jyhhchen2@gmail.com (JHC); rshseu@ntu.edu.tw (RSH)

## Introduction

Alzheimer's disease (AD) is the most common form of dementia among the elderly population that causes a gradual decline in cognitive abilities. According to the "amyloid cascade," amyloid plaques are formed through the abnormal aggregation of beta amyloids (A $\beta$ s) [1], which are deposited at the extracellular spaces of the brain and the walls of the cerebral blood vessels. Amyloid plaques increase levels of oxidative stress and neuroinflammation, and markedly reduce acetylcholine levels. They are crucial histological characteristics of the pathology of AD. The abnormal aggregation of A $\beta$  is a primary cause of the progressive changes of AD.

In the past few years, AD has been recognized as a degenerative disease of the central nervous system. However, recent evidence has shown the disturbance of the cerebrovascular and systemic vascular systems (vasculopathy) in AD patients. AD patients with a history of cerebrovascular disease are likely to have the disease develop rapidly. Evidence from brain imaging studies using cerebral computed tomography perfusion imaging (CTPI) [2], single-photon emission computed tomography (SPECT) [3], and MRI [4] has shown reduced regional cerebral blood flow (rCBF) in AD groups. Studies have shown that AD patients exhibit remarkable anomalies in hemodynamic parameters [5,6,7] and several substantial hemorheological changes caused by the accumulations of A $\beta$  [8,9], which may initiate the changes on

the cerebrovascular structure that cause the microvascular plasma layer of the brain to fail to deliver glucose, oxygen, amino acids, electrolytes, and other nutrients through the blood-brain barrier. Because of the low metabolism of glucose and the lack of oxygen delivery to the neurons of the brain, the neurons cannot receive the required amount of energy, leading to the death of the neuron and the deterioration of cognitive functions [6,10]. The cerebral microvasculature is a crucial target for the effects of hypoxia in the AD brain [11]. Hemorheological detections provide the most direct evidence for systemic vascular disturbances in AD patients. The hemorheological behavior of AD patients has also been reported. Significant differences exist in all hemorheological indices except hematocrit HCT between an AD group and a control group [12,13]. These hemorheological changes are some of the major vascular risk factors. The treatment of vascular risk factors is associated with a slow decline in Mini-Mental State Examination score in AD patients [14].

Aluminum (Al) is considered part of the etiology of AD [15–17]. An excess amount of Al causes amyloid neurotoxicity according to records of clinical observation and animal experiments [18]. Past animal studies have shown that Al-induced damages to the central nervous system include neuropathological, neurochemical, neurophysiological, and neurobehavioral changes. Among the changes, the most notable are poor learning and behavioral functions, which involve a change in acetylcholinesterase activity that deteriorates the learning ability of rats [19]. Excessive intake of Al may cause the deposition of amyloids in the central nerve cells, excessive APP expression, and learning and memory disorders in rats [20,21]. The neurotoxic effects of Al directly affect the function of glial cells (astrocytes) [22]. However, the exact mechanism of Al-induced dysfunction of the cerebral microcirculation is unclear. Therefore, we orally administered AlCl<sub>3</sub> to rats [23,24] to explore the hemodynamic and neuropathological changes of AD.

In this study, we used the difference-learning experimental model Morris water maze test to assess the learning and memory ability of rats with AlCl<sub>3</sub>-induced AD. Immunohistochemical (IHC) methods were applied to observe the A $\beta$  plaque levels, detect the activity of AChE-RBC- and AChE-hippocampus, and quantitate the content of cerebral neurochemicals by using proton magnetic resonance spectroscopy (1H-MRS). The 1H-MRS allows major metabolites to be measured noninvasively in defined regions of the living brain and can be used to detect biochemical abnormalities where conventional structural imaging shows normalities [25]. Therefore, we measured hemorheological parameters by using an auto-rotational viscometer with a different shear rate and detected rCBF by using arterial spin labeling MRI (ASL-MRI). Recently, ASL-MRI was used to measure hemodynamic parameters in patients with AD [26]. We propose the hypothesis that numerous A $\beta$  plaques increase erythrocyte aggregation and whole blood viscosity, which reduces rCBF. This impairment of rCBF adversely affects the activity of neurons. Large accumulation of A $\beta$  plaques can increase whole blood viscosity and the likelihood that cerebral degeneration will spread. In other words, we propose an A $\beta$ -correlated hemodynamic cascade hypothesis to elucidate the vital mechanisms of hemorheology and neurovascular pathology in AD.

## Materials and Methods

### Animal Model Preparation and Experimental Design

Twenty male Wistar rats weighing 220–260 g and aged 8–12 wk were procured from BioLasco Taiwan Co., Ltd. The Morris water maze test was used to exclude rats that performed

abnormally. The 20 qualified rats were randomly divided into 2 groups: control (n = 10) and (+)control (n = 10). Animal handling and experimental procedures were approved by the Institutional Animal Care and Use Committee (IACUC Approval No: 20120307).

The rats were administered daily aluminum chloride 500 mg/kg, i.g. for one month, and were subsequently fed with AlCl<sub>3</sub> solution (1600 ppm in distilled water) for up to 5 mo.

The AlCl<sub>3</sub>-induced brain dysfunction models were established 5 mo after the oral administration of Al. The Morris water maze test was used again to evaluate the learning and memory functions of the rats. ASL-MRI was used to calculate cerebral blood flow, MRS was used to detect cerebral metabolism, and magnetic resonance angiography (MRA) was used to detect changes in brain vessel morphology. Finally, the rats were euthanized. Simultaneously, blood from jugular and abdominal veins was collected to measure hematological, hemorheological, and biochemical parameters, and brain tissues were placed in formalin to observe the A $\beta$  plaque levels by using IHC staining method.

### Morris Water Maze Task

The water maze comprised a large black circular pool (180 cm in diameter, 75 cm in height) constructed using waterproof canvas, and a clear acrylic platform (20 cm in diameter, 47 cm in height) was placed inside the pool. The pool was filled to a height of 49 cm with water at approximately 23°C, and the surface of the platform was 2.0 cm below the surface of the water. The circular pool was divided into 4 quadrants (I, II, III, and IV), the platform was hidden in the middle of the 4th quadrant, and a camera connected to a computer to record the animal motions was positioned above the center of the pool. The rats were trained twice a day for 5 d, then once every month after being treated with AlCl<sub>3</sub> solution. The escape latency and searching distance were used to evaluate learning and memory functions, it was named the “reference memory task”. On Day 1, the adaptation period, the rats were placed in the water pool with no platform that could be used to escape and allowed to swim freely for 2 min. On Days 2 to 4, the water maze reference memory task was performed. First, the rats were placed in the pool 4 consecutive times and allowed to swim freely. The rats were then placed in the pool in one of the 4 quadrants (by 2→1→3→4 quadrant) and were required to find the platform to escape. The time taken to escape from the water (escape latency) and the path crossed in the water (searching distance) were measured and analyzed using an automated tracking system—Ethovision<sup>®</sup> XT, Version 8.0, Noldus system (Neuroscience Inc., Tokyo, Japan). The maximal escape latency time was specified as 120 s. If a rat was incapable of finding the platform within 120 s, the rat was guided to the platform and remained there for 30 s. When the trial was completed, the rat were removed from the water, towel and heater dried, and then returned to the original squirrel cages. On Day 5, the “water mazespatialprobe trial” was performed. The rats were placed in the water pool with no platform that could be used to escape and allowed to swim for 120. The swimming time and search distance of each rat in each quadrant was recorded. If the rats exhibited normal memory ability, they lingered in the platform quadrant (4th quadrant).

### MRI Measurements for Regional Cerebral Blood Flow, Angiography, and Cerebral Neurochemicals

The rats were placed in a cradle equipped with a stereotaxic holder, and a pressure probe was employed to monitor respiration. A whole-brain imaging protocol involving T2-weighted imaging (T2-WI), MRS, time-of-flight (TOF) MRA, and an arterial spin

labeling cerebral blood flow (ASL-CBF) test was adapted from a previous study [7]. MRI was performed using the BioSpec70/30(7T) system (Bruker, Ettlingen, Germany) with a birdcage head coil (inner diameter = 72 mm) for RF transmission and a phase array surface coil for reception in the MRS and TOF-MRA tests. A quadrature birdcage volume coil (inner diameter = 72 mm) was used for RF transmission and reception simultaneously in the ASL-CBF test. The T<sub>2</sub>-WI sequences were acquired using a TurboRARE-T<sub>2</sub> sequence with a matrix = 384 × 384, an FOV = 2.5 × 2.5 cm, 21 slices (slice thickness = 1 mm), TE/TR = 33/2500 ms, and 4 averages. The MRS data were acquired using a PRESS-1H sequence with TE/TR = 50/2000 ms, VOI = 2.3 × 2.3 × 2.3 mm (focus on the striatum area), a band width (BW) = 50 000 Hz, and a water suppression = VAPOR. TOF MRA was performed using a FLASH-3D-TOF sequence with a matrix = 256 × 256, FOV = 2.5 × 2.5 × 3.5 cm, TE/TR = 2.5/15 ms, a flip angle = 20°, and NEX = 1. ASL was performed using a flow-sensitive alternating inversion-recovery echo planar imaging (FAIR-EPI) sequence with a matrix of 128 × 128, FOV = 2.5 × 2.5 cm, an inversion recovery time (TIR) = 100 to 6000, 60 TIR values, recovery time = 10 000 ms, TE/TR = 25/18 000 ms. All image analyses were performed using Paravision software (Bruker, Ettlingen, Germany) on an MRI console. The Paravision 5.1 software platform (Bruker, Ettlingen, Germany) was used in the analysis of MRS, and processing was conducted using the TOPSPIN interface. Paravision 5.1 software was used in the source images and maximal intensity projection for MRA. The ASL images were analyzed using ASL Perfusion Processing program macro from Paravision software at a 7T blood T<sub>1</sub> value of 2200 ms [16]. CBF (in mL/[min 6100 g]) was derived from the non-selective and selective T<sub>1</sub> maps according to a CBF = λ. T<sub>1</sub> non-selective/T<sub>1</sub> blood (1/T<sub>1</sub> selective-1/T<sub>1</sub> non-selective), where λ is the blood-brain partition coefficient (i.e., the ratio between water concentration per gram of brain tissue and per millimeter of blood), which is estimated to be 90 mL/100 g.

### Preparation of Blood and Brain Samples

After an MRI was performed, all rats were anaesthetized with sodium pentobarbital, and the blood samples were collected for biochemical, immunological, hematological, and hemorheological analyses. The brain tissues were placed in a 10% formalin-fixed buffer at 4°C. The cerebral cortex and hippocampus were separated from the whole brain and put into a 0.9% sodium chloride solution at 4°C. The samples were then homogenized with a homogenizer centrifuged at 10 000 g for 10 min, and the supernatant was used for oxidative stress and neurochemical assays.

### Hematological and Hemorheological Measurements

A complete blood count (CBC), which measures the number of blood cells (red blood cells, white blood cells, and platelets), the total amount of hemoglobin (Hb), the fraction of blood composed of red blood cells (hematocrit; Hct), the average red blood cell size (MCV), Hb amount per red blood cell (MCH), and the amount of hemoglobin relative to the size of the cell (Hb concentration) per red blood cell (MCHC), was obtained using an automatic cell counter (Coulter LH750, Beckmen).

### Hemorheological Variables

Whole blood viscosity (WBV, η<sub>b</sub>), plasma viscosity (η<sub>p</sub>), the erythrocyte aggregation index (AI), and the erythrocyte rigidity index (RI) were measured using a computerized auto-rotational rheometer (HRD). The WBV measurements were implemented

according to the protocols outlined by standardized hemorheological methods [27]. The sequential WBV values at different shear rates (high shear rate = 120 s<sup>-1</sup>, medium shear rate = 70 s<sup>-1</sup>, and low shear rate = 30 s<sup>-1</sup>) were obtained for comparison between rats with AlCl<sub>3</sub>-induced AD and the controls, and was conducted using a computer-controlled testing program. The internal viscosity of erythrocyte Tk was calculated using Dintenfass's equation: Tk = [(η<sub>0.4</sub>-1)η<sub>0.4</sub>]/Hc. Plasma viscosity was detected at a high shear rate of 120 s, and the plasma fibrinogen was detected using the thrombin clot technique. The oxygen transport efficiency (OTE) of whole blood was calculated using the formula OTE = (Hct/η<sub>b</sub>) × 100% at a fixed shear rate [28,29].

### Biochemical and Immunological Analysis

The glucose, triglyceride, cholesterol, HDL-C, total protein, albumin, AST, ALT, Alk-P, and folic acid of serum were analyzed using a modular automatic biochemical analyzer (P800, Roche). The plasma homocysteine was analyzed using an automatic biochemical analyzer (7150, Hitachi). The AChE activity of RBCs was determined using an enzyme substrate method. The AChE activity of the hippocampus and cortex were determined using a choline oxidase method from a commercial kit (Amplex<sup>®</sup> Red Acetylcholinesterase Assay Kit, Invitrogen, USA).

### Glutathione Peroxidase, Superoxide Dismutase, Catalase, and MDA Assays

The mentioned supernatant from the hippocampus and cortex homogenates was used for neurochemical assay. The assay of glutathione peroxidase activity was performed by using the method of cumene hydroperoxide. The assay of SOD activity was conducted by using the method of xanthine oxidase. The assay of catalase activity was executed according to the method of hydrogen peroxide. The MDA content was analyzed by using the method of thiobarbituric acid (TBA) colorimetric analysis. All of these methods were performed according to the instructions included in the commercial assay kits (BioVision, USA).

### IHC Stain and Signal Analysis of Aβ<sub>40</sub> in the Hippocampus and Cortex

The brain tissue specimens of rats were fixed in a 10% formalin solution and embedded in paraffin sections with a thickness of 4 μm, which were prepared from paraffin blocks and collected sequentially without interrupting the wells. Sections from regions containing the hippocampal and cortex tissue were processed for Aβ<sub>40</sub> IHC staining. The analysis was conducted using an automatic staining machine (BenchMark XT, Ventana Medical Systems, Tucson, AZ, USA) and the iVIEW 3, 3-diaminobenzidine (DAB) detection Kit (Ventana Medical Systems). After the brain tissue sections (4 μm) on the slides were deparaffinized and hydrated, the slides were treated with an iVIEW inhibitor at 37°C for 4 min to inactivate the endogenous peroxidase activity. The slides were then incubated with an Aβ peptide N-terminal antibody (clone NT 3F5, mouse monoclonal, Mybiosource) and diluted in a 1:150 blocking solution at 37°C for 16 min. After rinsing with PBS, the slides were treated with iVIEW biotin-conjugated IgG in a blocking solution for 8 min at room temperature. The slides were rinsed again and subsequently incubated with iVIEW streptavidin-conjugated HRP in the blocking solution for 8 min at room temperature. The Aβ peptide signals were developed in iVIEW DAB and hydrogen peroxide for 8 min at 37°C. The slides were finally incubated with iVIEW copper for 4 min to enhance the signal intensity, and were counterstained with hematoxylin (Vector Laboratories,

Burlingame, CA). The A $\beta$ 40 accumulation in the hippocampus was monitored using a snatch microscope examination.

### Statistical Analysis

All data were processed using a statistical software package, SPSS17 (Chicago, IL, USA). The results were expressed as the mean  $\pm$  standard deviation (mean  $\pm$  SD), and the Wilcoxin rank-sum test ( $\alpha = 0.05$ ) was used for the comparison of the means. A *P* value less than 0.05 was considered statistically significant.

## Results

### Comparing the Environmental Conditions of the Animals and Water Maze Results

The body weight increased significantly after 5 mo in each group, but no significant differences were found between the control and (+)control groups. The water intake (mL/d) and food intake (g/d) of rats in the control and (+)control groups also showed no significant differences.

Regarding the water maze results, the (+)control rats always exhibited a longer escape latency and searching distance than control rats (Figure 1). The spatial probe trial was conducted following the reference memory trial. We found a significant difference between the control and (+)control groups in the mean time spent in the target quadrant and the contralateral quadrant. The (+)control rats spent less time searching the target quadrant than did the control rats ( $P < 0.05$ ). The swim pathway was instrumental in determining the learning and memory capacities of the rats in the spatial probe trial. Figure 2 shows that rats in the (+)control group searched the target quadrant in a directionless manner and swam around the entire pool.

### Results of Blood Biochemical Analysis

The results of blood biochemistry analysis reveal that the concentrations of fibrinogen, AChE-RBC, AChE-hippocampus and AChE-cortex in the (+)control group were significantly higher than that in the control group. No significant differences were found in glucose, triglyceride, cholesterol, HDL-C, total protein, albumin, AST, Alk-P, homocysteine, and folic acid between the control and (+)control groups (Table 1).

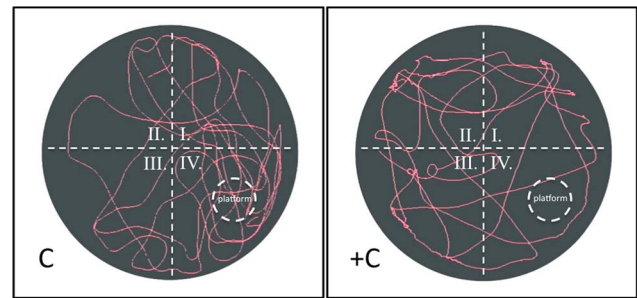

**Figure 2. Water Maze Spatial Probe Trial.** The swim pathway was instrumental in determining the learning and memory capacities of the rats. The results show that the (+)control group searched the target quadrant in a directionless manner and swam around the entire pool. Conversely, the control group swam directly to the target quadrant and lingered for a long time because of their superior memory and learning abilities.

doi:10.1371/journal.pone.0082561.g002

### Oxidative Stress in the Rats with AlCl<sub>3</sub>-induced AD

This study examined glutathione peroxidase, superoxide dismutase, catalase activities, and MDA content. Table 2 shows that the activities of glutathione peroxidase, superoxide dismutase, and catalase were reduced in the hippocampus and the supernatant of the cerebral cortex of the rats with AlCl<sub>3</sub>-induced AD ( $P < 0.01$ ), and that the MDA content increased in the supernatant of the hippocampus and cerebral cortex and the erythrocytes of the jugular blood of rats with AlCl<sub>3</sub>-induced AD.

### MRI Acquisition and Data Analysis

In this study, we compared the rCBF images, TOF-MRA images, and the metabolism of the brain according to MRS. The rCBF and NAA value of rats with AlCl<sub>3</sub>-induced AD were quantified. The rCBF values in the cortex and hippocampus decreased by 40%–50% in rats with AlCl<sub>3</sub>-induced AD (Figure 3). The brain blood vessel signal of rats with AlCl<sub>3</sub>-induced AD was too low to be detected using TOF-MRA; the brain vessel of control rats was considerably high density whereas the (+)control group exhibited a lower density in the image (Figure 4).

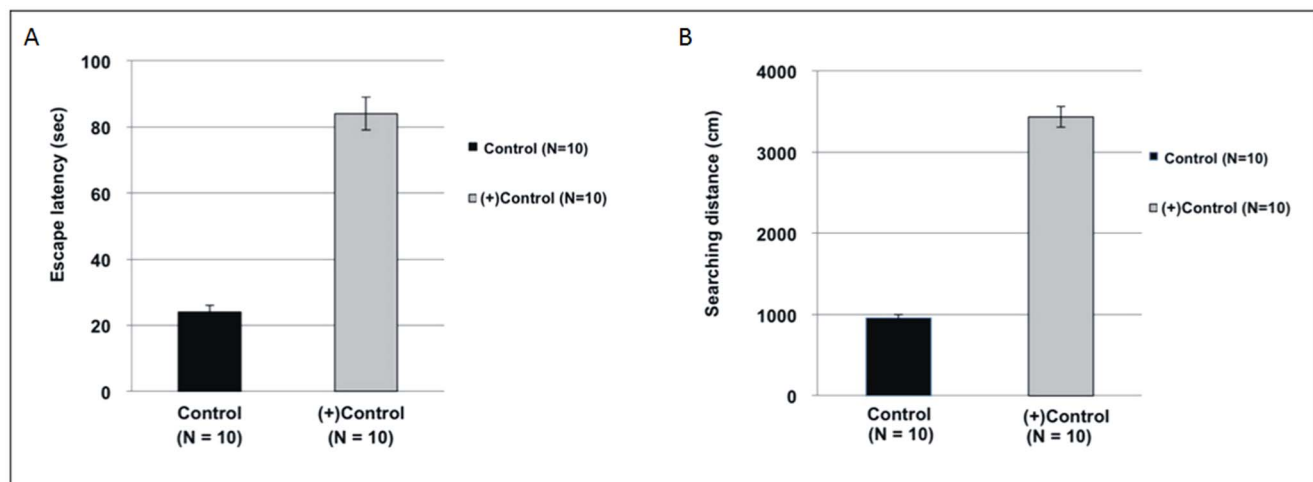

**Figure 1. Reference memory task of water maze results.** The escape latency (A) and searching distance (B) were used to evaluate the learning and memory functions of the rats. The results showed that the (+)control group exhibited a longer escape latency and searching distance than did the control group ( $P < 0.05$ ).

doi:10.1371/journal.pone.0082561.g001

**Table 1.** The results of the biochemical analysis of blood in the control and (+)control groups.

| Parameters                  | Control (n = 10) | (+) Control (n = 10) | P Value |
|-----------------------------|------------------|----------------------|---------|
| Glu (mg/dl)                 | 115.8±17.3       | 113.7±14.8           | N/S     |
| TG (mg/dl)                  | 70.8±12.8        | 69.9±13.9            | N/S     |
| Chol (mg/dl)                | 83.1±15.1        | 84.2±12.4            | N/S     |
| HDL-C (mg/dl)               | 56.7±6.5         | 54.8±7.3             | N/S     |
| TP (g/dL)                   | 6.1±0.5          | 6.2±0.3              | N/S     |
| ALB (g/dL)                  | 3.8±0.3          | 3.9±0.2              | N/S     |
| AST (U/L)                   | 133.0±16.9       | 135.4±17.3           | N/S     |
| ALT (U/L)                   | 44.0±9.9         | 45.8±8.8             | N/S     |
| Alk-P                       | 47.9±11.2        | 49.3±13.9            | N/S     |
| Fibrinogen (mg/dl)          | 184.0±6.9        | 197.8±7.3            | <0.05   |
| Hcy (μmol/L)                | 19.4±1.4         | 20.3±1.7             | N/S     |
| Folic acid (ng/ml)          | 23.5±2.1         | 23.6±2.2             | N/S     |
| AChE-RBC (mole/min.L)       | 2.36±0.17        | 4.91±0.15            | <0.01   |
| AChE-hippocampus (mU/ml/mg) | 55.51±6.24       | 91.77±9.63           | <0.01   |
| AChE-cortex (mU/ml/mg)      | 15.16±0.84       | 19.38±0.90           | <0.01   |

Glu: glucose; TG: triglyceride; Chol: cholesterol; HDL-C: high-density lipoprotein-cholesterol; TP: total protein; ALB: albumin; AST: aspartate aminotransferase; ALT: alanine aminotransferase; Alk-P: alkaline phosphatase; Hcy: homocysteine; AChE: acetylcholinesterase.

Data are presented as mean ± SD.

doi:10.1371/journal.pone.0082561.t001

Furthermore, when detecting the metabolism of the rat brain by using MR spectroscopy, we used the ratio of NAA and creatine (Cr) to determine the NAA concentration (Figure 5). The NAA of rats with AlCl<sub>3</sub>-induced AD was approximately 30% lower than that of control rats.

#### Hemorheological Analysis in Rats with AlCl<sub>3</sub>-induced AD

Tables 3 and 4 show a comparison of complete blood count (CBC) parameters for the rats. Regardless of whether the blood sample was taken from the jugular or the abdominal vein, no significant differences between the control group and the (+)control group were found for any of the CBC parameters. However, Hgb and Hct from the jugular blood were significantly higher than that of the abdominal vein blood in both groups. Tables 5 and 6 show a comparison of hemorheological parameters

taken from the jugular blood and the abdominal vein blood of the rats. Except for TK and all other hemorheological parameters were significantly different between the control group and the (+)control group. The WBV, plasma viscosity, and RAI in the (+)control group are significantly higher than in the control group, whereas the EI and OTE in the (+)control group were significantly lower than in the control group. In the (+)control group, WBV of the jugular blood was significantly higher than that of the abdominal vein blood at a low shear rate compared with the control group. Furthermore, an alignment analysis of the relationship among rCBF, hemorheological analysis, and cognitive ability showed that rats with higher WBV expressed lower rCBF and longer escape latency (Figure 6).

**Table 2.** The activities of glutathione peroxidase, superoxide dismutase, and catalase reduced in the supernatant of the hippocampus and cerebral cortex of rats with AlCl<sub>3</sub>-induced AD (*P*<0.05), and the MDA content increased in the supernatant of the hippocampus and cerebral cortex and the erythrocytes of the jugular blood of rats with AlCl<sub>3</sub>-induced AD.

| Parameters                                  | Control group (n = 10) | (+)Control group (n = 10) | P Value |
|---------------------------------------------|------------------------|---------------------------|---------|
| SOD activity in hippo (Inhibition rate/mg)  | 18.05%±0.84%           | 10.43%±0.99%              | <0.01   |
| SOD activity in cortex (Inhibition rate/mg) | 2.84%±0.25%            | 1.36%±0.19%               | <0.01   |
| Catalase Activity in hippo (mU/ml/mg)       | 0.189±0.01             | 0.087±0.009               | <0.01   |
| Catalase Activity in cortex (mU/ml/mg)      | 0.050±0.006            | 0.026±0.004               | <0.01   |
| GPx activity in hippo (mU/ml/mg)            | 14.52±0.10             | 8.00±0.67                 | <0.01   |
| GPx activity in cortex (mU/ml/mg)           | 1.18±0.01              | 0.03±0.004                | <0.01   |
| MDA in hippo (nmol/mg)                      | 0.028±0.005            | 0.117±0.010               | <0.01   |
| MDA in cortex (nmol/mg)                     | 0.044±0.006            | 0.126±0.010               | <0.01   |
| MDA in RBCs of jugular blood (nmol/mg)      | 1.06±0.04              | 3.87±0.12                 | <0.01   |

Activities of superoxide dismutase (SOD), catalase, glutathione peroxidase (GPx), and malondialdehyde (MDA) in the control and (+) control groups.

Data are presented as mean ± SD.

doi:10.1371/journal.pone.0082561.t002

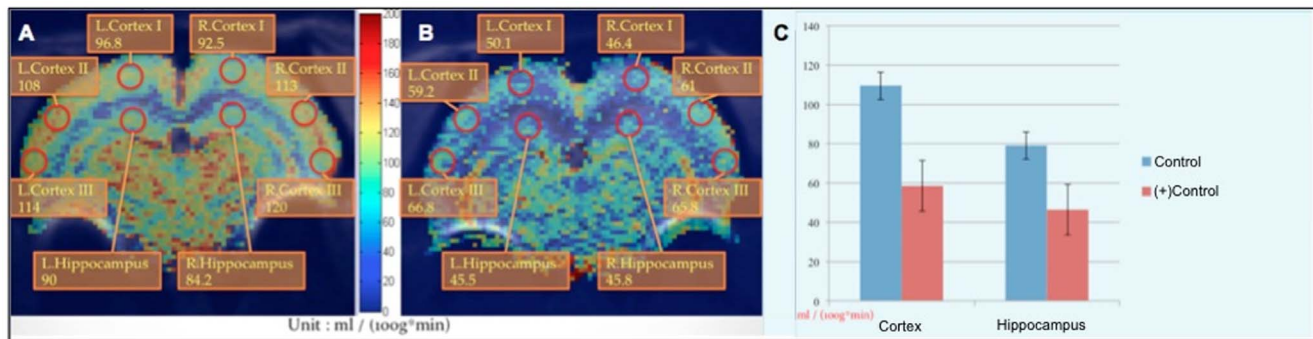

**Figure 3. rCBF values of the hippocampus and cortex region.** Images of control rats (A) and rats with AlCl<sub>3</sub>-induced AD (B) show that the rCBF decreased by approximately 40% to 50% in rats with AlCl<sub>3</sub>-induced AD compared with control rats (C). doi:10.1371/journal.pone.0082561.g003

### A $\beta$ Deposits in the Neurons and Vessels of the Hippocampus and Cortex

Significantly more A $\beta$ -containing plaques accumulated in the hippocampus and cortex of the rats with AlCl<sub>3</sub>-induced AD (Figure 7) based on IHC staining and visualizing A $\beta$ 40, which were conducted using a monoclonal A $\beta$ 40 antibody kit. The A $\beta$  deposits in diffuse plaques (Figure 8A) were frequently observed accumulating around neurons (Figure 8B).

### Discussion

#### Changes in Cerebral Neuropathology and Cognitive Ability in Rats with AlCl<sub>3</sub>-induced AD

Enigmatic peptide A $\beta$  deposition was proven to be a central event in the neuropathology of AD [1]. The A $\beta$  formed insoluble fibrillar aggregates that accumulated in association with cerebral parenchyma and vasculature cells [30]. The Al is implicated in the etiology of neurodegenerative diseases including AD [31]. Evidence proved that Al significantly contributes to AD [32]. Our studies on the changes in cerebral neuropathology indicated that rats in the AlCl<sub>3</sub>-induced AD group exhibited significantly more A $\beta$ -containing plaques in the hippocampus and cortex compared to the control group. The Al replaces calcium and magnesium in the brain. It then combines with the glutamic acid and arginine of amino acid chains to form a stable compound of glutamic acid salt and an arginine salt, which are finally deposited in the brain. The Al also combines with transferrins in the blood and is deposited in the brain cortex, hippocampus, and amygdala. These regions are rich in glutamate neurons; therefore, an abnormal protein phosphorylation reaction occurs, ultimately

resulting in the formation of the amyloid precursor protein and yielding A $\beta$ senile plaques and neurofibrillary tangles [33,34]. The Al can block the induction of long-term potentiation (LTP) in the hippocampal CA3 area of rats [35]. This study evaluated the memory and learning abilities of rats by using the Morris water maze test, which showed that the control group spent a significantly shorter time searching for the target platform and traveled shorter distances to reach the target platform compared to the (+)control group ( $P < 0.05$ ) during memory recall tasks. Moreover, the control group frequently spent a longer time lingering in the target quadrant during probe trials compared to the (+)control group. The results clearly indicate that the control rats have superior memory and learning ability, which enables them to intentionally find the escape platform in the water maze test. In contrast, rats with AlCl<sub>3</sub>-induced AD swam along the wall of the pool without attention to direction, indicating that the (+)control rats were unable to preserve and retrieve neural messages. The AlCl<sub>3</sub>-impaired manifestation of the rats in the Morris water maze test [24] causes significant cognitive impairment [20]. The brains of AD patients have higher mean Al concentrations in the hippocampus [36].

#### AlCl<sub>3</sub>-induced Oxidative Stress and A $\beta$

The A $\beta$  plaque accumulation results in cerebral amyloid angiopathy and oxidative stress in the brain and exacerbates the impairment of learning and memory abilities. In turn, oxidative stress triggers A $\beta$  accumulation in an aging brain or a brain with sporadic AD. Our study shows that rats with AlCl<sub>3</sub>-induced AD exhibit greater A $\beta$ -containing plaques accumulating in the hippocampus, cortex, and cerebral vessels, increased MDA content in the erythrocytes of jugular blood and the supernatant of the cerebral cortex and hippocampus, and reduced glutathione peroxidase, superoxide dismutase, and catalase in the supernatant of the cerebral cortex and hippocampus compared with control rats. A previous study showed that A $\beta$ 40 infusion increases acetylcholinesterase activity, reactive oxygen species, and lipid peroxidation, and reduces total antioxidant status and superoxide dismutase activity in the brain [37], possibly because the accompanying A $\beta$  plaque formation activates local as well as microglial and astrocytic inflammatory responses, thereby producing oxidative stress.

In addition, aluminum is extremely reactive with carbon and oxygen, and compromises the integrity of the BBB and increases its permeability [38–40]. Chronic exposure to aluminum through drinking water may A $\beta$ -independently and selectively increase

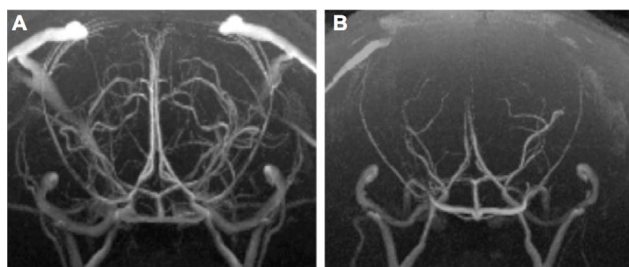

**Figure 4. MRI angiography (TOF-MRA) results of the 2 groups of rats.** Compared with control rats (A), most vessels around the hippocampus and cortex cannot be observed in rats with AlCl<sub>3</sub>-induced AD (B). doi:10.1371/journal.pone.0082561.g004

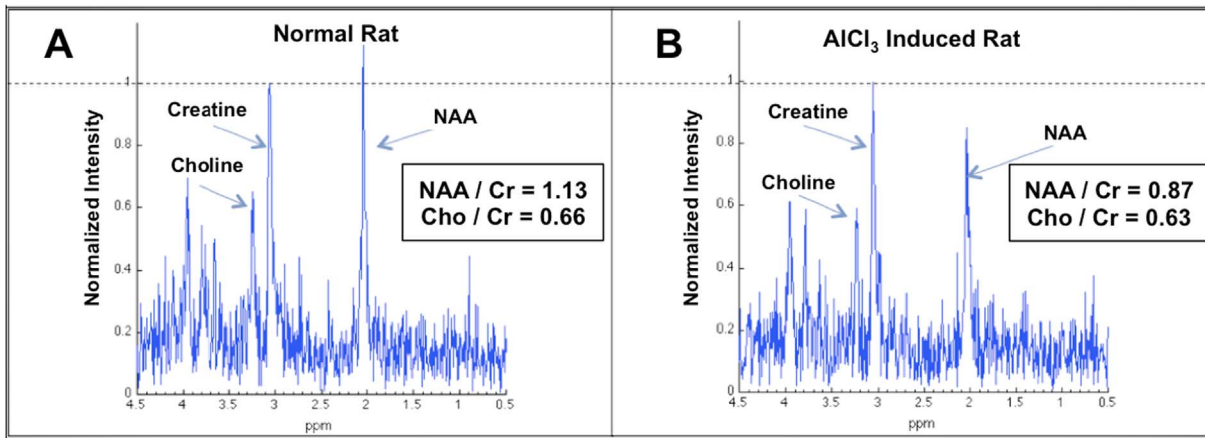

**Figure 5. Comparison of the NAA content of the 2 groups.** The NAA concentration in rats with AlCl<sub>3</sub>-induced AD (B) was significantly 10%–20% lower than in control rats (A). doi:10.1371/journal.pone.0082561.g005

inflammatory processes in the central nervous system [41]. Therefore, several reported results may be A $\beta$ -independent.

### $\beta$ -amyloids and Hemorheological Changes

This study shows that rats with AlCl<sub>3</sub>-induced AD exhibited greater accumulation of A $\beta$ -containing plaques in the hippocampus, cortex, and cerebral vessels, which increases vascular resistance [42], alters hemorheological behavior, and contributes to endothelial dysfunction and vasculopathy [43,44]. In addition, A $\beta$ -containing plaque accumulation induces RBC aggregation and causes changes in the shear stress of the vessel wall, thereby increasing WBV. Dense A $\beta$  plaques appear to initially develop along blood vessels [45,46]. Mohanty showed that the red blood cell (RBC) morphology in AD subjects is altered, and these alterations in the RBC membrane architecture are possibly due to RBC-A $\beta$  interactions and changes in the expression of membrane proteins [47]. The A $\beta$  induces oxidative injury to RBCs by binding to them, causing RBC phospholipid peroxidation. The A $\beta$

fibrils can induce erythrocyte adhesion to endothelial cells [48]. The adherence of RBCs to the endothelium reduces the CBF, impairing oxygen delivery to the brain, thus contributing to cerebral hypoxia.

### AlCl<sub>3</sub>-induced Oxidative stress and Hemorheological Changes

AD is associated with abnormal changes of the erythrocyte membrane [47]. Exposure to oxidative stress can dramatically change the function of the erythrocyte membrane, reducing erythrocyte deformability, increasing erythrocyte aggregation, and elevating viscosity [49–51]. This study showed decreased erythrocyte EI in rats with AlCl<sub>3</sub>-induced AD caused by erythrocyte membrane abnormality because no significant differences in the TK value existed between the 2 groups. The reduced erythrocyte deformability could result in elevating WBV at a high shear rate and impair the cerebral OTE. Moreover, rats with AlCl<sub>3</sub>-induced AD exhibited a high concentration of plasma fibrinogen, which

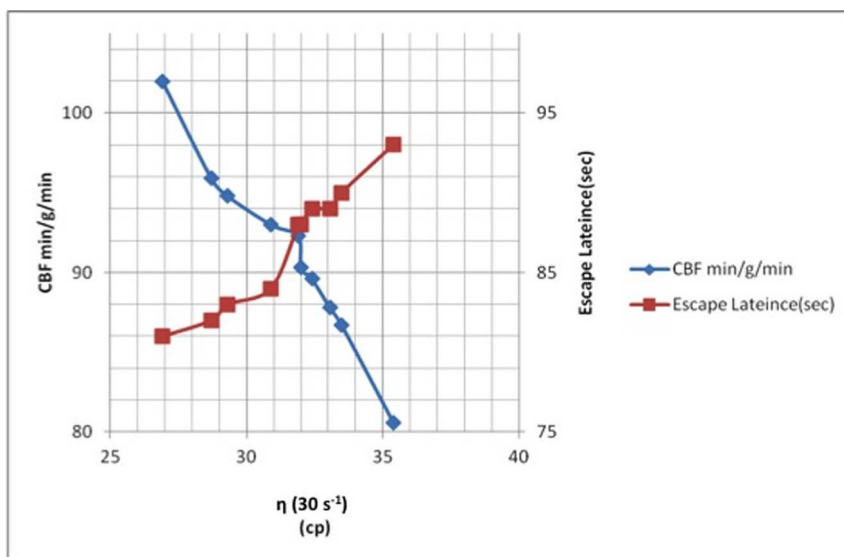

**Figure 6. The relationships among  $\eta$ WB, CBF, and escape latency.** The results show that rats with higher whole blood viscosity expressed lower rCBF and longer escape latency. doi:10.1371/journal.pone.0082561.g006

**Table 3.** Hematological parameters from the jugular blood of rats in the control and (+)control groups show no significant differences.

| Parameters                             | Control (n = 10) | (+) Control (n = 10) | P Value |
|----------------------------------------|------------------|----------------------|---------|
| WBC ( $\times 10^3/\text{mm}^3$ )      | 2.4 $\pm$ 0.7    | 2.2 $\pm$ 0.9        | N/S     |
| RBC ( $\times 10^6/\text{mm}^3$ )      | 8.58 $\pm$ 0.29  | 8.79 $\pm$ 0.28      | N/S     |
| Hgb (g/dl)                             | 15.7 $\pm$ 0.5   | 15.9 $\pm$ 0.5       | N/S     |
| Hct (%)                                | 45.1 $\pm$ 1.4   | 45.9 $\pm$ 0.7       | N/S     |
| MCV                                    | 52.5 $\pm$ 1.2   | 52.2 $\pm$ 1.5       | N/S     |
| MCH                                    | 18.3 $\pm$ 0.7   | 18.1 $\pm$ 0.4       | N/S     |
| MCHC                                   | 34.8 $\pm$ 1.0   | 34.6 $\pm$ 1.0       | N/S     |
| Platelet ( $\times 10^3/\mu\text{l}$ ) | 992.4 $\pm$ 59.6 | 966.5 $\pm$ 96.5     | N/S     |

Data are presented as mean  $\pm$  SD.  
doi:10.1371/journal.pone.0082561.t003

markedly increased erythrocyte aggregation and plasma viscosity as well as increased WBV at a low shear rate.

Fibrinogen is a large glycoprotein that is synthesized from the liver, circulates in the blood at micromolar concentrations, and can be converted into insoluble fibrin, which is essential for blood coagulation. Previous studies have shown several lines of evidence for the role of fibrinogen in the pathology of AD; A $\beta$  plaques ties fibrinogen leading to circulatory deficiencies. In vitro and in vivo experiments have shown that fibrin clots formed in the presence of A $\beta$  are structurally abnormal and resistant to degradation. Fibrinogen was observed in blood vessels positive for amyloids in mouse and human AD samples [52] and AD patients. High concentrations of fibrinogen have been associated with an increased risk for AD patients and a surged risk for dementia transformation in patients with mild cognitive impairment (MCI); depleting fibrinogen reduced cerebral amyloid angiopathy and cognitive impairment in AD mice [52]. Therefore, we suggest a pathogenic role for fibrinogen in which high fibrinogen concentrations accelerate erythrocyte aggregation, increase plasma viscosity, promote adhesion to A $\beta$  plaques, and impede the clearance of A $\beta$ , causing a change of fibrin clotting that impairs cerebral blood flow and elevates inflammation, thus contributing to cognitive decline in rats with AlCl<sub>3</sub>-induced AD.

**Table 4.** Hematological parameters from the abdominal vein blood of rats in the control and (+)control groups show no significant differences.

| Parameters                             | Control (n = 10)  | (+) Control (n = 10) | P Value |
|----------------------------------------|-------------------|----------------------|---------|
| WBC ( $\times 10^3/\text{mm}^3$ )      | 1.9 $\pm$ 1.2     | 1.6 $\pm$ 1.0        | N/S     |
| RBC ( $\times 10^6/\text{mm}^3$ )      | 8.12 $\pm$ 0.32   | 8.23 $\pm$ 0.26      | N/S     |
| Hgb (g/dl)                             | 14.6 $\pm$ 0.6    | 14.9 $\pm$ 0.5       | N/S     |
| Hct (%)                                | 42.4 $\pm$ 1.8    | 43.7 $\pm$ 1.3       | N/S     |
| MCV                                    | 52.2 $\pm$ 1.4    | 53.1 $\pm$ 1.1       | N/S     |
| MCH                                    | 18.0 $\pm$ 0.3    | 18.1 $\pm$ 0.3       | N/S     |
| MCHC                                   | 34.4 $\pm$ 0.6    | 34.2 $\pm$ 0.8       | N/S     |
| Platelet ( $\times 10^3/\mu\text{l}$ ) | 1022.7 $\pm$ 65.4 | 916.4 $\pm$ 222.3    | N/S     |

Data are presented as mean  $\pm$  SD.  
doi:10.1371/journal.pone.0082561.t004

**Table 5.** Hematological parameters from the jugular blood of rats in the control and (+)control groups.

| Parameters              | Control (n = 10)  | (+) Control (n = 10) | P Value |
|-------------------------|-------------------|----------------------|---------|
| $\eta$ WB (cp)          |                   |                      |         |
| r = 120 S <sup>-1</sup> | 7.37 $\pm$ 0.87   | 9.52 $\pm$ 0.42      | <0.01   |
| r = 70 S <sup>-1</sup>  | 8.63 $\pm$ 0.90   | 10.91 $\pm$ 0.58     | <0.01   |
| r = 30 S <sup>-1</sup>  | 12.49 $\pm$ 0.89  | 15.57 $\pm$ 0.68     | <0.01   |
| $\eta$ P                | 1.85 $\pm$ 0.07   | 2.20 $\pm$ 0.20      | <0.01   |
| RAI                     | 4.85 $\pm$ 0.56   | 6.12 $\pm$ 0.73      | <0.01   |
| EI                      | 13.10 $\pm$ 1.07  | 15.59 $\pm$ 1.34     | <0.01   |
| TK                      | 0.94 $\pm$ 0.07   | 0.96 $\pm$ 0.09      | N/S     |
| OTE                     | 0.062 $\pm$ 0.007 | 0.048 $\pm$ 0.002    | <0.01   |

$\eta$ WB: viscosity of whole blood, cp = mpa-s;  $\eta$ P: viscosity of plasma; RAI: RBC aggregation index; EI: erythrocyte electrophoresis indexes; TK: internal viscosity of erythrocyte, OTE: oxygen transport efficiency or oxygen delivery index of whole blood = Hct/ $\eta$  WB.

Data are presented as mean  $\pm$  SD.  
doi:10.1371/journal.pone.0082561.t005

### Hemorheological Changes and Regional Cerebral Blood Flow

Blood flow is not affected by A $\beta$ s in the heart and kidneys. The A $\beta$  vasoactivity is specific to the cerebral vasculature in both rats and humans, in which A $\beta$ 40 exhibited similar potency on cerebral vessels [42]. The clinical correlation between hypoxia and the increased incidence of AD has been well described. Cerebral hypoxia triggers hypometabolic, degenerative, and cognitive alterations in the brain and contributes to the pathology of AD [53]. In addition to the mentioned hemorheology results, we used ASL-MRI and MRA techniques to initially measure the rCBF of rats. Rats with AlCl<sub>3</sub>-induced AD showed a significantly reduced rCBF in the hippocampus and cortex compared with that of the control group ( $P < 0.01$ ), and the rCBF of the hippocampus was lower than that of the cortex. We also found that most vessels of the hippocampus and cortex could not be excited using radio frequencies (RFs), which is possibly due to the direct and specific constrictive effect of A $\beta$ s on cerebral vessels and may contribute to cerebral hypoperfusion [42]. Two consistent findings in the pathologic ultrastructure of cerebral capillaries regarding AD that

**Table 6.** Hematological parameters from the abdominal vein blood of rats in the control and (+)control groups.

| Parameters              | Control (n = 10)  | (+) Control (n = 10) | P Value |
|-------------------------|-------------------|----------------------|---------|
| $\eta$ WB(cp)           |                   |                      |         |
| r = 120 S <sup>-1</sup> | 6.34 $\pm$ 0.68   | 8.40 $\pm$ 0.67      | <0.01   |
| r = 70 S <sup>-1</sup>  | 7.50 $\pm$ 0.94   | 9.71 $\pm$ 0.84      | <0.01   |
| r = 30 S <sup>-1</sup>  | 11.22 $\pm$ 0.88  | 13.71 $\pm$ 0.89     | <0.01   |
| $\eta$ P                | 1.79 $\pm$ 0.14   | 2.08 $\pm$ 0.12      | <0.01   |
| RAI                     | 4.68 $\pm$ 0.55   | 5.95 $\pm$ 0.79      | <0.01   |
| EI                      | 12.91 $\pm$ 0.81  | 15.39 $\pm$ 0.84     | <0.01   |
| TK                      | 0.94 $\pm$ 0.07   | 0.95 $\pm$ 0.05      | N/S     |
| OTE                     | 0.067 $\pm$ 0.008 | 0.051 $\pm$ 0.004    | <0.01   |

Data are presented as mean  $\pm$  SD.  
doi:10.1371/journal.pone.0082561.t006



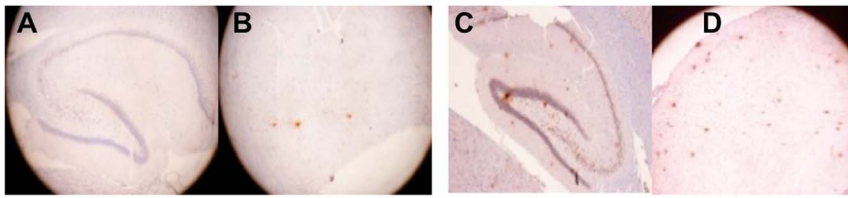

**Figure 7. The IHC stain results of the 2 groups.** The A $\beta$ 40 plaque accumulation in the hippocampus and cortex was monitored using a microscopic examination (100 $\times$ ) and is indicated by the red dye. In the (+)control group (C and D), significantly more A $\beta$ -containing plaques accumulated in the hippocampus and cortex than in the control group (A and B). doi:10.1371/journal.pone.0082561.g007

influence the laws of fluid dynamics are basement membrane thickening [54] and intramural amyloid deposits (dysphoric angiopathy) [55,56]. In addition, we found an apparent inverse relationship between WBV and rCBF in rats with AlCl<sub>3</sub>-induced AD.

### Changes in Neurochemicals

MRS plays a crucial role in the early diagnosis of AD. Similar to using structural MRI, using MRS for rat models requires high-resolution scanning to reduce the signal-to-noise ratio (SNR). The results strongly match those of humans and can be used for longitudinal studies that are considerably shorter than those for human cohorts [57]. In this study, we used MRS to preliminarily measure the content of NAA. Rats with AlCl<sub>3</sub>-induced AD showed significantly lower levels of NAA. This result is inconsistent with those of previous studies [25,58]. NAA is primarily a marker of neuronal viability and integrity. A previous study showed that APP(Swe)/PS1(dE9) transgenic mice had a significantly decreased hippocampal NAA total creatine (tCr) levels, which are associated with the degeneration and intracellular deposition of A $\beta$  aggregates in hippocampal CA3 pyramidal neurons [59]. In addition to the results listed in Table 3, this shows that the concentration of AChE-RBC in rats with AlCl<sub>3</sub>-induced AD is significantly higher than that of control rats, indicating that neurotransmission functions might be severely affected in rats with AlCl<sub>3</sub>-induced AD. Acetylcholinesterase (AChE) is a senile plaque component that promotes amyloid fibril assembly and the formation of highly toxic A $\beta$ -AChE. The A $\beta$ -AChE complexes induce a greater neurotoxic effect than that induced by the A $\beta$  peptide alone, as shown both in vitro (hippocampal neurons) and in vivo (the A $\beta$  peptide was injected into the dorsal hippocampus of rats) [60,61]. The AChE-RBC derived from nerve tissue, muscle, and erythrocyte membrane resembles the AChE of the

nervous system, which has a high decomposing ability against acetylcholine and enables nerve cell repetitive depolarization.

### Neurovascular Uncoupling and Impaired Cognitive Abilities

This study showed that rats with AlCl<sub>3</sub>-induced AD exhibited significantly reduced neuron activity and rCBF. Adequate rCBF to neurons protects the tight dynamic relationship between the cellular elements of the neurovascular unit and homeostasis of the cerebral microenvironment (neurovascular coupling), which enhances the cognitive abilities of the brain. Zlokovic indicated that microvascular abnormalities lead to a faulty BBB clearance of A $\beta$ s through the deregulated low-density lipoprotein-related protein 1 and receptor for advanced glycation end-product (RAGE)-mediated transport. These impaired clearances of A $\beta$ s and glycation end-products result in aberrant angiogenesis, remodeling of the cerebral microvasculature, and eventual arterial dysfunction, which in turn causes neurovascular uncoupling [62]. The progressive neurological impairment in AD is associated with a significant increase in A $\beta$ senile plaque and neurofibrillary tangle counts [63].

These data suggest that a rational mechanism exists for both the hemodynamic and neuropathological changes in rats with AlCl<sub>3</sub>-induced AD. When A $\beta$  plaques increase, oxidative injury to the erythrocyte membrane causes a reduction in erythrocyte deformability, an elevation of plasma fibrinogen, and erythrocyte aggregation. This leads to the adherence of RBCs to the endothelium and, thus, increases the WBV, thereby reducing the CBF and OTE. In addition, the obstructions caused by A $\beta$  plaques found on the affected vessel walls might directly interfere with brain microcirculation [8]. In contrast, A $\beta$ -containing plaques deposited in the hippocampus and cortex lead to the formation of a highly neurotoxic A $\beta$ -AChE complex, reducing the

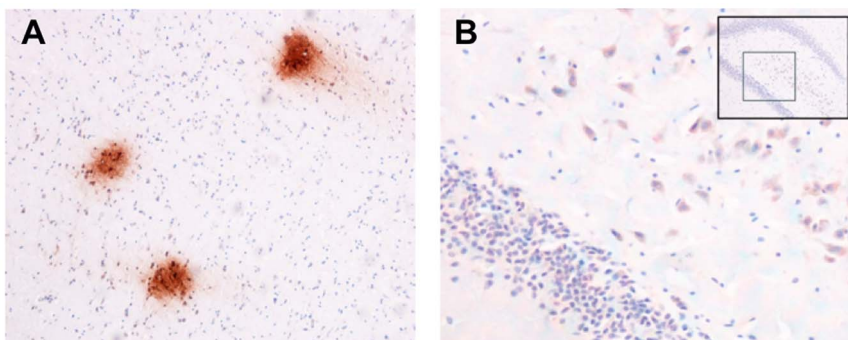

**Figure 8. Advanced IHC stain result of the rats with AlCl<sub>3</sub>-induced AD.** (A) The IHC stain shows A $\beta$  deposits in diffuse plaques. (B) The IHC stain shows A $\beta$ s (red) accumulating around neurons. doi:10.1371/journal.pone.0082561.g008

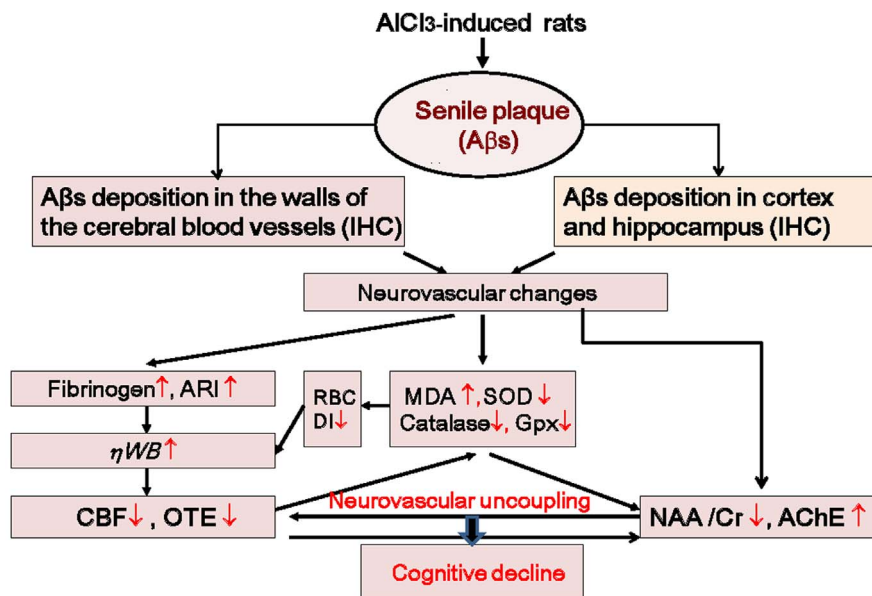

**Figure 9. All pathway relationships among A $\beta$ s, neurovascular changes, and cognitive decline in rats with AICl<sub>3</sub>-induced AD.** An increase of A $\beta$  plaques induces oxidative stress and, thus, increases the WBV and reduces the CBF and OTE. Moreover, rats with AICl<sub>3</sub>-induced AD exhibit a high concentration of plasma fibrinogen, which increases erythrocyte aggregation, plasma viscosity, and WBV. In contrast, A $\beta$  plaques increase and deposit in the neurons of the hippocampus and cortex, increasing the activity of AChE and reducing the levels of NAA and Cr. The sustained neurovascular uncoupling ultimately results in cognitive decline. doi:10.1371/journal.pone.0082561.g009

NAA level and neural activation. Therefore, the sustained neurovascular uncoupling hampers the cerebral microenvironment and ultimately results in cognitive decline (Figure 9).

## Conclusion

These results underscore the importance of hemorheology and reinforce the specific association between hemodynamic and neuropathological changes in rats with AICl<sub>3</sub>-induced AD. The results revealed that the insufficient rCBF in rats with AICl<sub>3</sub>-induced AD was caused by increasing the A $\beta$  plaque accumulation and altering abnormal hemorheological parameters such as erythrocyte deformability, erythrocyte aggregation, OTE, and fibrinogen concentrations, which subsequently increased the WBV. The A $\beta$  plaques were also found to debilitate the activity of neurons by elevating AChE concentration and reducing the NAA content in rats with AICl<sub>3</sub>-induced AD. These effects have been confirmed by the behavior tasks, MRI data, and IHC staining of A $\beta$ s in the rat brain. This study featured hemorheology,

CBF testing, MRS, MRA, and IHC staining to demonstrate the hemodynamic and neuropathological changes in rats with AICl<sub>3</sub>-induced AD. Hemorheological parameters, such as WBV and fibrinogen, coupled with AChE-RBC may be useful biomarkers for disease progression evaluations and the therapeutic monitoring of AD patients that can be used instead of invasive inspections.

## Acknowledgments

We thank the 7T Animal MRI Core Lab of the Neurobiology and Cognitive Science Center, National Taiwan University, for technical support and providing the facilities.

## Author Contributions

Conceived and designed the experiments: SMC RSH. Performed the experiments: SMC CCF MSC CC. Analyzed the data: SMC CCF MSC RSH. Contributed reagents/materials/analysis tools: SMC JHC RSH. Wrote the paper: SMC.

## References

- Hardy J, Allsop D (1991) Amyloid deposition as the central event in the aetiology of Alzheimer's disease. *Trends Pharmacol Sci* 12: 383–388.
- Tang Z, Pi X, Chen F, Shi L, Gong H, et al. (2012) Fifty percent reduced-dose cerebral CT perfusion imaging of Alzheimer's disease: regional blood flow abnormalities. *Am J Alzheimers Dis Other Dement* 27: 267–274.
- Kanaya K, Abe S, Sakai M, Fujii H, Koizumi K, et al. (2012) Efficacy of a high dosage of donepezil for Alzheimer's disease as examined by single-photon emission computed tomography imaging. *Psychogeriatrics* 12: 172–178.
- Li W, Antuono PG, Xie C, Chen G, Jones JL, et al. (2012) Changes in regional cerebral blood flow and functional connectivity in the cholinergic pathway associated with cognitive performance in subjects with mild Alzheimer's disease after 12-week donepezil treatment. *Neuroimage* 60: 1083–1091.
- de la Torre JC, Mussivand T (1993) Can disturbed brain microcirculation cause Alzheimer's disease? *Neurol Res* 15: 146–153.
- Ajmani RS, Metter EJ, Jaykumar R, Ingram DK, Spangler EL, et al. (2000) Hemodynamic changes during aging associated with cerebral blood flow and impaired cognitive function. *Neurobiol Aging* 21: 257–269.
- Solerte SB, Ceresini G, Ferrari E, Fioravanti M (2000) Hemorheological changes and overproduction of cytokines from immune cells in mild to moderate dementia of the Alzheimer's type: adverse effects on cerebrovascular system. *Neurobiol Aging* 21: 271–281.
- Wen ZY, Xie JX, Guan ZW, Sun DG, Yao WJ, et al. (2000) A study of hemorheological behaviour for patients with Alzheimer's disease at the early stages. *Clinical Hemorheology and Microcirculation* 22: 261–266.
- Chang CY, Liang HJ, Chow SY, Chen SM, Liu DZ (2007) Hemorheological mechanisms in Alzheimer's disease. *Microcirculation* 14: 627–634.
- de la Torre JC (1994) Impaired brain microcirculation may trigger Alzheimer's disease. *Neurosci Biobehav Rev* 18: 397–401.
- Grammas P, Tripathy D, Sanchez A, Yin X, Luo J (2011) Brain microvasculature and hypoxia-related proteins in Alzheimer's disease. *Int J Clin Exp Pathol* 4: 616–627.
- Wen Z, Xie J, Guan Z, Sun D, Yao W, et al. (2000) A study of hemorheological behaviour for patients with Alzheimer's disease at the early stages. *Clin Hemorheol Microcirc* 22: 261–266.

13. Chang CY, Liang HJ, Chow SY, Chen SM, Liu DZ (2007) Hemorheological mechanisms in Alzheimer's disease. *Microcirculation* 14: 627–634.
14. Deschaintre Y, Richard F, Leys D, Pasquier F (2009) Treatment of vascular risk factors is associated with slower decline in Alzheimer disease. *Neurology* 73: 674–680.
15. Erazi H, Sansar W, Ahboucha S, Gamrani H (2010) Aluminum affects glial system and behavior of rats. *C R Biol* 333: 23–27.
16. Rondeau V, Commenges D, Jacqmin-Gadda H, Dartigues JF (2000) Relation between aluminum concentrations in drinking water and Alzheimer's disease: an 8-year follow-up study. *Am J Epidemiol* 152: 59–66.
17. Flaten TP (2001) Aluminum as a risk factor in Alzheimer's disease, with emphasis on drinking water. *Brain Res Bull* 55: 187–196.
18. Hanson P, Mahieu P, Gersdorff M, Sindic C, Lauwerys R (1995) Fatal encephalopathy after otoneurosurgery procedure with an aluminum-containing biomaterial. *J Toxicol Clin Toxicol* 33: 645–648.
19. Zatta P, Ibn-Lkhatay-Idrissi M, Zambenedetti P, Kilyen M, Kiss T (2002) In vivo and in vitro effects of aluminum on the activity of mouse brain acetylcholinesterase. *Brain Res Bull* 59: 41–45.
20. Hardy JA, Higgins GA (1992) Alzheimer's disease: the amyloid cascade hypothesis. *Science* 256: 353–356.
21. Castorina A, Tiralongo A, Giunta S, Luisa Carnazza M, Scapagnini G, et al. (2010) Early effects of aluminum chloride on beta-secretase mRNA expression in a neuronal model of  $\beta$ -amyloid toxicity. *Cell Biol Toxicol* 26: 367–377.
22. Erazi H, Sansar W, Ahboucha S, Gamrani H (2010) Aluminum affects glial system and behavior of rats. *C R Biol* 333: 23–27.
23. Toledano A, Alvarez MI (2004) Lesions and dysfunctions of the nucleus basalis as Alzheimer's disease models: general and critical overview and analysis of the long-term changes in several excitotoxic models. *Curr Alzheimer Res* 1: 189–214.
24. Gong QH, Wu Q, Huang XN, Sun AS, Nie J, et al. (2006) Protective effect of Ginkgo biloba leaf extract on learning and memory deficit induced by aluminum in model rats. *Chin J Integr Med* 12: 37–41.
25. Jones RS, Waldman AD (2004) 1H-MRS evaluation of metabolism in Alzheimer's disease and vascular dementia. *Neuro Res* 26: 488–495.
26. Yoshiura T, Hiwatashi A, Yamashita K, Ohyagi Y, Monji A, et al. (2009) Simultaneous measurement of arterial transit time, arterial blood volume, and cerebral blood flow using arterial spin-labeling in patients with Alzheimer disease. *AJNR Am J Neuroradiol* 30: 1388–1393.
27. Baskurt OK, Boynard M, Coklet GC, Connes P, Cooke BM, et al. (2009) New guidelines for hemorheological laboratory techniques. *Clin Hemorheol Microcirc* 42: 75–97.
28. Chien S (2006) Present state of blood rheology. In: Messmer K, Schmid-Schoenbein H, editors. *Hemodilution. Theoretical basis and Clinical Application*. Basel: Karger. pp. 1–45.
29. Akama K, Morizawa K, Tokuyama S, Satoh T, Kobayashi K, et al. (1994) Oxygen transport and in vivo parameters of artificial red cells (ARC). *Artif Cells Blood Substit Immobil Biotechnol* 22: 901–907.
30. Mattson MP, Begley JG, Mark RJ, Furukawa K (1997) Abeta<sub>25–35</sub> induces rapid lysis of red blood cells: contrast with Abeta<sub>1–42</sub> and examination of underlying mechanisms. *Brain Res* 771: 147–153.
31. Mattson MP, Begley JG, Mark RJ, Furukawa K (1997) Abeta<sub>25–35</sub> induces rapid lysis of red blood cells: contrast with Abeta<sub>1–42</sub> and examination of underlying mechanisms. *Brain Res* 771: 147–153.
32. Tomljenovic L (2011) Aluminum and Alzheimer's disease: after a century of controversy, is there a plausible link? *J Alzheimers Dis* 23: 567–598.
33. Zhang ZJ, Qian YH, Hu HT, Yang J, Yang GD (2003) The herbal medicine *Dipsacus asper* wall extract reduces the cognitive deficits and overexpression of beta-amyloid protein induced by aluminum exposure. *Life Sci* 73: 2443–2454.
34. Jones KR, Black MJ, Oorschot DE (1998) Do aluminium and/or glutamate induce Alzheimer PHF-like formation? An electron microscopic study. *J Neurocytol* 27: 59–68.
35. Liang RF, Li WQ, Wang XH, Zhang HF, Wang H, et al. (2012) Aluminium-maltolate-induced impairment of learning, memory and hippocampal long-term potentiation in rats. *Ind Health* 50: 428–436.
36. Rusina R, Matej R, Kasparova L, Kukal J, Urban P (2011) Higher aluminum concentration in Alzheimer's disease after Box-Cox data transformation. *Neurotox Res* 20: 329–333.
37. Lee CL, Kuo TF, Wang JJ, Pan TM (2007) Red mold rice ameliorates impairment of memory and learning ability in intracerebroventricular amyloid beta-infused rat by repressing amyloid beta accumulation. *J Neurosci Res* 85: 3171–3182.
38. Banks WA, Kastin AJ (1989) Aluminum-induced neurotoxicity: alterations in membrane function at the blood-brain barrier. *Neurosci Biobehav Rev* 13: 47–53.
39. Zheng W (2001) Neurotoxicology of the brain barrier system: new implications. *J Toxicol Clin Toxicol* 39: 711–719.
40. Yokel RA (2006) Blood-brain barrier flux of aluminum, manganese, iron and other metals suspected to contribute to metal-induced neurodegeneration. *J Alzheimers Dis* 10: 223–253.
41. Campbell A, Becaria A, Lahiri DK, Sharman K, Bondy SC (2004) Chronic exposure to aluminum in drinking water increases inflammatory parameters selectively in the brain. *J Neurosci Res* 75: 565–572.
42. Suo Z, Humphrey J, Kundtz A, Sethi F, Placzek A, et al. (1998) Soluble Alzheimers beta-amyloid constricts the cerebral vasculature in vivo. *Neurosci Lett* 257: 77–80.
43. Smith MM, Chen PC, Li CS, Ramanujam S, Cheung AT (2009) Whole blood viscosity and microvascular abnormalities in Alzheimer's Disease. *Clin Hemorheol Microcirc* 41: 229–239.
44. Velcheva I, Antonova N, Titianova E, Damianov P, Dimitrov N, et al. (2008) Hemorheological disturbances in cerebrovascular diseases. *Clin Hemorheol Microcirc* 39: 391–396.
45. Gama Sosa MA, Gasperi RD, Rocher AB, Wang AC, Janssen WG, et al. (2010) Age-related vascular pathology in transgenic mice expressing presenilin 1-associated familial Alzheimer's disease mutations. *Am J Pathol* 176: 353–368.
46. Davis J, Xu F, Deane R, Romanov G, Previti ML, et al. (2004) Early-onset and robust cerebral microvascular accumulation of amyloid beta-protein in transgenic mice expressing low levels of a vasculotropic Dutch/Iowa mutant form of amyloid beta-protein precursor. *J Biol Chem* 279: 20296–20306.
47. Mohanty JG, Shukla HD, Williamson JD, Launer LJ, Saxena S, et al. (2010) Alterations in red blood cell membrane proteome in Alzheimer's subjects reflect disease-related changes and provide insight into altered cell morphology. *Proteome Sci* 8: 11.
48. Ravi LB, Mohanty JG, Chrest FJ, Jayakumar R, Nagababu E, et al. (2004) Influence of beta-amyloid fibrils on the interactions between red blood cells and endothelial cells. *Neuro Res* 26: 579–585.
49. Samukawa K, Suzuki Y, Ohkubo N, Aoto M, Sakanaka M, et al. (2008) Protective effect of ginsenosides Rg(2) and Rh(1) on oxidation-induced impairment of erythrocyte membrane properties. *Biorheology* 45: 689–700.
50. Low TY, Seow TK, Chung MC (2002) Separation of human erythrocyte membrane associated proteins with one-dimensional and two-dimensional gel electrophoresis followed by identification with matrix-assisted laser desorption/ionization-time of flight mass spectrometry. *Proteomics* 2: 1229–1239.
51. Goodman SR, Kurdia A, Ammann L, Kakhniashvili D, Daescu O (2007) The human red blood cell proteome and interactome. *Exp Biol Med (Maywood)* 232: 1391–1408.
52. Cortes-Canteli M, Paul J, Norris EH, Bronstein R, Ahn HJ, et al. (2010) Fibrinogen and beta-amyloid association alters thrombosis and fibrinolysis: a possible contributing factor to Alzheimer's disease. *Neuron* 66: 695–709.
53. Ogunshola OO, Antoniou X (2009) Contribution of hypoxia to Alzheimer's disease: is HIF-1 $\alpha$  a mediator of neurodegeneration? *Cell Mol Life Sci* 66: 3555–3563.
54. Higuchi Y, Miyakawa T, Shimoji A, Katsuragi S (1987) Ultrastructural changes of blood vessels in the cerebral cortex in Alzheimer's disease. *Jpn J Psychiatry Neurol* 41: 283–290.
55. Miyakawa T, Kuramoto R (1989) Ultrastructural study of senile plaques and microvessels in the brain with Alzheimer's disease and Down's syndrome. *Ann Med* 21: 99–102.
56. Miyakawa T, Uehara Y (1979) Observations of amyloid angiopathy and senile plaques by the scanning electron microscope. *Acta Neuropathol* 48: 153–156.
57. Zhang L, Chang RC, Chu LW, Mak HK (2012) Current neuroimaging techniques in Alzheimer's disease and applications in animal models. *Am J Nucl Med Mol Imaging* 2: 386–404.
58. Wang Z, Zhao C, Yu L, Zhou W, Li K (2009) Regional metabolic changes in the hippocampus and posterior cingulate area detected with 3-Tesla magnetic resonance spectroscopy in patients with mild cognitive impairment and Alzheimer disease. *Acta Radiol* 50: 312–319.
59. Xu W, Zhan Y, Huang W, Wang X, Zhang S, et al. (2010) Reduction of hippocampal N-acetyl aspartate level in aged APP(Swe)/PS1(dE9) transgenic mice is associated with degeneration of CA3 pyramidal neurons. *J Neurosci Res* 88: 3155–3160.
60. Inestrosa NC, Urria S, Colombres M (2004) Acetylcholinesterase (AChE)-amyloid-beta-peptide complexes in Alzheimer's disease: the Wnt signaling pathway. *Curr Alzheimer Res* 1: 249–254.
61. Inestrosa NC, Alvarez A, Pérez CA, Moreno RD, Vicente M, et al. (1996) Acetylcholinesterase accelerates assembly of amyloid-beta-peptides into Alzheimer's fibrils: possible role of the peripheral site of the enzyme. *Neuron* 16: 881–891.
62. Zlokovic BV (2008) The blood-brain barrier in health and chronic neurodegenerative disorders. *Neuron* 57: 178–201.
63. Di Patre PL, Read SL, Cummings JL, Tomiyasu U, Vartavarian LM, et al. (1999) Progression of clinical deterioration and pathological changes in patients with Alzheimer disease evaluated at biopsy and autopsy. *Arch Neurol* 56: 1254–1261.
